# Supplementary material for: ECETOC TRAv3: An In-depth Comparison of Publicly Available Measurement Data Sets With Modelled Estimates of Occupational Inhalation Exposure to Chemicals
Source: PubMed Central journal article supplement — Ann Work Expo Health. 2023 Feb 15;67(4):496–507. doi: 10.1093/annweh/wxad001 (PMC10119696; doi:10.1093/annweh/wxad001), 2023-02-15
Supplement: wxad001_suppl_supplementary_material.pdf [file wxad001_suppl_supplementary_material.pdf]

## ECETOC TRAv3: an in-depth comparison of publicly available measurement data sets with modelled estimates of occupational inhalation exposure to chemicals

Nenad Savic, Jan Urbanus, Oliver Henschel, Qiang Li, Dave Marsh, Chris Money, Dook Noij, Paul van de Sandt, Joost van Rooij and Matthias Wormuth

### Supplementary material *(for legenda, see last page of document)*

| Reference                                                           | Additional info | ID        | Category | Task description                                                        | Ind/Prof | PROC | Substance          | CAS no   | MW     |
|---------------------------------------------------------------------|-----------------|-----------|----------|-------------------------------------------------------------------------|----------|------|--------------------|----------|--------|
| Kupczewska et.al; Int J Occup Med Environ Health 2011;24(2):208–217 |                 | KUPCE-1   | liquids  | filtration, decanting activities in synthesis section (paints&lacquers) | Ind      | 4    | Toluene            | 108-88-3 | 92.1   |
| Kupczewska et.al; Int J Occup Med Environ Health 2011;24(2):208–217 |                 | KUPCE-2   | liquids  | sole manipulation in shoe factory                                       | Ind      | 10   | Toluene            | 108-88-3 | 92.1   |
| Kupczewska et.al; Int J Occup Med Environ Health 2011;24(2):208–217 |                 | KUPCE-3   | liquids  | sewing in shoe factory                                                  | Ind      | 10   | Toluene            | 108-88-3 | 92.1   |
| Kupczewska et.al; Int J Occup Med Environ Health 2011;24(2):208–217 |                 | KUPCE-5   | liquids  | refinery activities (supervisor, controller, operator, mechanician)     | Ind      | 2    | Toluene            | 108-88-3 | 92.1   |
| Kupczewska et.al; Int J Occup Med Environ Health 2011;24(2):208–217 |                 | KUPCE-6   | liquids  | filtration, decanting activities in synthesis section (paints&lacquers) | Ind      | 4    | Ethylacetate       | 141-78-6 | 88.1   |
| Kupczewska et.al; Int J Occup Med Environ Health 2011;24(2):208–217 |                 | KUPCE-7   | liquids  | sole manipulation in shoe factory                                       | Ind      | 10   | Ethylacetate       | 141-78-6 | 88.1   |
| Kupczewska et.al; Int J Occup Med Environ Health 2011;24(2):208–217 |                 | KUPCE-8   | liquids  | sewing in shoe factory                                                  | Ind      | 10   | Ethylacetate       | 141-78-6 | 88.1   |
| Kupczewska et.al; Int J Occup Med Environ Health 2011;24(2):208–217 |                 | KUPCE-10  | liquids  | filtration, decanting activities in synthesis section (paints&lacquers) | Ind      | 4    | Acetone            | 67-64-1  | 58.1   |
| Kupczewska et.al; Int J Occup Med Environ Health 2011;24(2):208–217 |                 | KUPCE-11  | liquids  | sole manipulation in shoe factory                                       | Ind      | 10   | Acetone            | 67-64-1  | 58.1   |
| Kupczewska et.al; Int J Occup Med Environ Health 2011;24(2):208–217 |                 | KUPCE-12  | liquids  | sewing in shoe factory                                                  | Ind      | 10   | Acetone            | 67-64-1  | 58.1   |
| Kupczewska et.al; Int J Occup Med Environ Health 2011;24(2):208–217 |                 | KUPCE-14  | liquids  | filtration, decanting activities in synthesis section (paints&lacquers) | Ind      | 4    | Xylene             | 95-47-6  | 106.2  |
| Spee et.al; Int J Hyg Environ Health 2017; 220: 1190-1194           |                 | SPEE-2    | liquids  | floor coating, bakery                                                   | Pro      | 10   | Methylmethacrylate | 80-62-6  | 100.1  |
| Lee et.al; Ann Work Exp Health 2019; 63(2): 197-217                 |                 | TCE-1-twa | liquids  | dipping in cleaning bath                                                | Ind      | 10   | Trichloroethylene  | 79-01-6  | 131.39 |
| Lee et.al; Ann Work Exp Health 2019; 63(2): 197-217                 |                 | TCE-2-twa | liquids  | spraying solvent                                                        | Ind      | 7    | Trichloroethylene  | 79-01-6  | 131.39 |
| Lee et.al; Ann Work Exp Health 2019; 63(2): 197-217                 |                 | TCE-3-twa | liquids  | spraying in cleaner                                                     | Ind      | 13   | Trichloroethylene  | 79-01-6  | 131.39 |

| ID        | VP [Pa] | Fugacity | Conc (%) | Duration Category | Indoor/ Outdoor | Ventilation | LEV | RPE | n  | Sample time (min) | <LOD | GM (mg/m3) | GM (ppm) | GSD  |
|-----------|---------|----------|----------|-------------------|-----------------|-------------|-----|-----|----|-------------------|------|------------|----------|------|
| KUPCE-1   | 3089    | Medium   | 1-5%     | >4hr              | I               | No          | Yes | No  | 16 | 450               | 0    |            | 0.17     | 1.95 |
| KUPCE-2   | 3089    | Medium   | >25%     | >4hr              | I               | GV          | No  | No  | 8  | 450               | 0    |            | 16.84    | 1.75 |
| KUPCE-3   | 3089    | Medium   | >25%     | >4hr              | I               | GV          | No  | No  | 21 | 450               | 0    |            | 37.53    | 1.52 |
| KUPCE-5   | 3089    | Medium   | >25%     | >4hr              | O               | Outdoors    | No  | No  | 23 | 450               | 0    |            | 0.05     | 2.19 |
| KUPCE-6   | 10300   | High     | 5-25%    | >4hr              | I               | No          | Yes | No  | 14 | 450               | 0    |            | 1.91     | 2.45 |
| KUPCE-7   | 10300   | High     | >25%     | >4hr              | I               | GV          | No  | No  | 8  | 450               | 0    |            | 9.90     | 1.15 |
| KUPCE-8   | 10300   | High     | >25%     | >4hr              | I               | GV          | No  | No  | 21 | 450               | 0    |            | 48.61    | 1.44 |
| KUPCE-10  | 24000   | High     | <1%      | >4hr              | I               | No          | Yes | no  | 16 | 450               | 0    |            | 0.01     | 4.46 |
| KUPCE-11  | 24000   | High     | >25%     | >4hr              | I               | GV          | No  | No  | 8  | 450               | 0    |            | 29.84    | 1.15 |
| KUPCE-12  | 24000   | High     | >25%     | >4hr              | I               | GV          | No  | No  | 21 | 450               | 0    |            | 34.16    | 1.59 |
| KUPCE-14  | 821     | Medium   | >25%     | >4hr              | I               | No          | Yes | no  | 11 | 450               | 0    |            | 1.32     | 1.98 |
| SPEE-2    | 3700    | medium   | >25%     | >4hr              | I               | No          | No  | No  | 6  | 480               | 0    |            | 39.56    | 2.20 |
| TCE-1-twa | 9900    | Medium   | >25%     | 1-4hr             | I               | No          | No  | No  | 6  | 360               | 0    |            | 8.38     | 2.61 |
| TCE-2-twa | 9900    | Medium   | >25%     | 1-4hr             | I               | No          | Yes | No  | 7  | 480               | 0    |            | 4.50     | 3.07 |
| TCE-3-twa | 13332   | High     | >25%     | 1-4hr             | I               | No          | Yes | No  | 7  | 360               | 3    |            | 0.20     | 3.48 |

| ID        | P75 (mg/m3) | P75 (ppm) | TRA value (mg/m3) | TRA value (ppm) | ratio P75/TRA | Revised setting (ind/pro) and PROC assignment                                                                                                                                                                                              | Revised RMM/OC/PPE assignment                                                                    | Valid for TRA comparison |
|-----------|-------------|-----------|-------------------|-----------------|---------------|--------------------------------------------------------------------------------------------------------------------------------------------------------------------------------------------------------------------------------------------|--------------------------------------------------------------------------------------------------|--------------------------|
| KUPCE-1   |             | 0.27      |                   | 0.40            | 0.66          | contextual information indicates PROC4 is more appropriate than PROC2 (ECHA R12: not a continuous process; substantial opportunity for exposure)                                                                                           |                                                                                                  | Yes                      |
| KUPCE-2   |             | 24.94     |                   | 35.00           | 0.71          |                                                                                                                                                                                                                                            | ventilation changed from No to GV (no full info on workplace ventilation and LEV was accessible) | Yes                      |
| KUPCE-3   |             | 50.69     |                   | 35.00           | 1.45          |                                                                                                                                                                                                                                            | ventilation changed from No to GV (no full info on workplace ventilation and LEV was accessible) | Yes                      |
| KUPCE-5   |             | 0.08      |                   | 3.50            | 0.02          | contextual information indicates PROC2 is more appropriate than PROC1 (ECHA R12: opportunity for exposure)                                                                                                                                 | indoors changed to outdoors (refinery: typical outdoor activities)                               | Yes                      |
| KUPCE-6   |             | 3.56      |                   | 6.00            | 0.59          | contextual information indicates PROC4 is more appropriate than PROC2 (ECHA R12: not a continuous process; substantial opportunity for exposure)                                                                                           |                                                                                                  | Yes                      |
| KUPCE-7   |             | 11.05     |                   | 175.00          | 0.06          |                                                                                                                                                                                                                                            | ventilation changed from No to GV (no full info on workplace ventilation and LEV was accessible) | Yes                      |
| KUPCE-8   |             | 63.06     |                   | 175.00          | 0.36          |                                                                                                                                                                                                                                            | ventilation changed from No to GV (no full info on workplace ventilation and LEV was accessible) | Yes                      |
| KUPCE-10  |             | 0.03      |                   | 1.00            | 0.03          | contextual information indicates PROC4 is more appropriate than PROC2 (ECHA R12: not a continuous process; substantial opportunity for exposure)                                                                                           |                                                                                                  | Yes                      |
| KUPCE-11  |             | 33.25     |                   | 175.00          | 0.19          |                                                                                                                                                                                                                                            | ventilation changed from No to GV (no full info on workplace ventilation and LEV was accessible) | Yes                      |
| KUPCE-12  |             | 47.41     |                   | 175.00          | 0.27          |                                                                                                                                                                                                                                            | ventilation changed from No to GV (no full info on workplace ventilation and LEV was accessible) | Yes                      |
| KUPCE-14  |             | 2.13      |                   | 2.00            | 1.07          | contextual information indicates PROC4 is more appropriate than PROC2 (ECHA R12: not a continuous process; substantial opportunity for exposure)                                                                                           |                                                                                                  | Yes                      |
| SPEE-2    |             | 68.43     |                   | 100.00          | 0.68          |                                                                                                                                                                                                                                            |                                                                                                  | Yes                      |
| TCE-1-twa |             | 16.00     |                   | 30.00           | 0.53          |                                                                                                                                                                                                                                            |                                                                                                  | Yes                      |
| TCE-2-twa |             | 9.58      |                   | 7.50            | 1.28          | contextual information indicates PROC7 is more appropriate than PROC13 (ECHA R12: task description is "spraying"; coding in Stoffenmanager is "Handling of liquids at high pressure resulting in substantial generation of mist of spray") | RPE changed from Yes to No (no indication that measurements have been performed inside the mask) | Yes                      |
| TCE-3-twa |             | 0.46      |                   | 15.00           | 0.03          |                                                                                                                                                                                                                                            |                                                                                                  | Yes                      |

| Reference                                                | Additional info | ID        | Category | Task description                | Ind/Prof | PROC | Substance         | CAS no   | MW     |
|----------------------------------------------------------|-----------------|-----------|----------|---------------------------------|----------|------|-------------------|----------|--------|
| Lee et.al; Ann Work Exp Health 2019; 63(2): 197-217      |                 | TCE-5-twa | liquids  | spraying solvent                | Ind      | 10   | Trichloroethylene | 79-01-6  | 131.39 |
| Lee et.al; Ann Work Exp Health 2019; 63(2): 197-217      |                 | PCE-1-twa | liquids  | spraying in cleaner             | Ind      | 10   | Perchloroethylene | 127-18-4 | 165.83 |
| Lee et.al; Ann Work Exp Health 2019; 63(2): 197-217      |                 | PCE-2-twa | liquids  | spraying solvent                | Ind      | 7    | Perchloroethylene | 127-18-4 | 165.83 |
| Lee et.al; Ann Work Exp Health 2019; 63(2): 197-217      |                 | PCE-3-twa | liquids  | spraying solvent                | Ind      | 10   | Perchloroethylene | 127-18-4 | 165.83 |
| Lee et.al; Ann Work Exp Health 2019; 63(2): 197-217      |                 | PCE-4-twa | liquids  | dipping in cleaning bath        | Ind      | 7    | Perchloroethylene | 127-18-4 | 165.83 |
| Lee et.al; Ann Work Exp Health 2019; 63(2): 197-217      |                 | PCE-5-twa | liquids  | spraying solvent                | Ind      | 7    | Perchloroethylene | 127-18-4 | 165.83 |
| Lee et.al; Ann Work Exp Health 2019; 63(2): 197-217      |                 | AA-1-twa  | liquids  | spraying solvent                | Ind      | 15   | Allyl alcohol     | 107-18-6 | 58.08  |
| Lee et.al; Ann Work Exp Health 2019; 63(2): 197-217      |                 | AA-2-twa  | liquids  | spraying solvent                | Ind      | 13   | Allyl alcohol     | 107-18-6 | 58.08  |
| Lee et.al; Ann Work Exp Health 2019; 63(2): 197-217      |                 | ACE-1-twa | liquids  | spraying solvent                | Ind      | 10   | Acetone           | 67-64-1  | 58.08  |
| Lee et.al; Ann Work Exp Health 2019; 63(2): 197-217      |                 | ACE-2-twa | liquids  | spraying in cleaner             | Ind      | 10   | Acetone           | 67-64-1  | 58.08  |
| Lee et.al; Ann Work Exp Health 2019; 63(2): 197-217      |                 | ACE-3-twa | liquids  | spraying solvent                | Ind      | 10   | Acetone           | 67-64-1  | 58.08  |
| Lee et.al; Ann Work Exp Health 2019; 63(2): 197-217      |                 | ACE-4-twa | liquids  | spraying in cleaner             | Ind      | 10   | Acetone           | 67-64-1  | 58.08  |
| Lee et.al; Ann Work Exp Health 2019; 63(2): 197-217      |                 | ACE-5-twa | liquids  | spraying solvent                | Ind      | 10   | Acetone           | 67-64-1  | 58.08  |
| Lee et.al; Ann Work Exp Health 2019; 63(2): 197-217      |                 | BMP-1-twa | liquids  | dipping in cleaning bath        | Ind      | 15   | 1-Bromopropane    | 106-94-5 | 123    |
| Lee et.al; Ann Work Exp Health 2019; 63(2): 197-217      |                 | CYC-1-twa | liquids  | pouring in cleaning bath        | Ind      | 13   | Cyclohexanone     | 108-94-1 | 98.15  |
| Tongeren et.al; Ann Work Exp Health 2017; 61(8): 921-938 | ART data        | ETEAM-60  | liquids  | Rinsing activities of glassware | Pro      | 13   | Acetone           | 67-64-1  | 58.08  |

| ID        | VP [Pa] | Fugacity | Conc (%) | Duration Category | Indoor/ Outdoor | Ventilation | LEV | RPE | n  | Sample time (min) | <LOD | GM (mg/m3) | GM (ppm) | GSD  |
|-----------|---------|----------|----------|-------------------|-----------------|-------------|-----|-----|----|-------------------|------|------------|----------|------|
| TCE-5-twa | 9900    | Medium   | >25%     | 1-4hr             | I               | No          | Yes | No  | 6  | 360               | 0    |            | 5.33     | 1.57 |
| PCE-1-twa | 2500    | Medium   | >25%     | 1-4hr             | I               | No          | Yes | No  | 9  | 480               | 0    |            | 3.01     | 1.84 |
| PCE-2-twa | 2500    | Medium   | >25%     | <15min            | I               | No          | Yes | No  | 6  | 360               | 0    |            | 13.90    | 1.75 |
| PCE-3-twa | 2500    | Medium   | >25%     | 1-4hr             | I               | No          | Yes | No  | 8  | 360               | 0    |            | 1.20     | 1.60 |
| PCE-4-twa | 2500    | Medium   | >25%     | 1-4hr             | I               | No          | No  | No  | 10 | 360               | 0    |            | 13.42    | 4.26 |
| PCE-5-twa | 2500    | Medium   | >25%     | 1-4hr             | I               | No          | Yes | No  | 8  | 480               | 0    |            | 15.55    | 1.91 |
| AA-1-twa  | 3140    | Medium   | >25%     | 1-4hr             | I               | GV          | No  | No  | 20 | 480               | 2    |            | 0.09     | 5.68 |
| AA-2-twa  | 3140    | Medium   | >25%     | 1-4hr             | I               | No          | Yes | No  | 17 | 360               | 2    |            | 0.15     | 4.99 |
| ACE-1-twa | 24000   | High     | >25%     | 1-4hr             | I               | No          | Yes | No  | 20 | 480               | 0    |            | 2.07     | 4.77 |
| ACE-2-twa | 24000   | High     | >25%     | 1-4hr             | I               | No          | Yes | No  | 7  | 480               | 0    |            | 2.61     | 3.09 |
| ACE-3-twa | 24000   | High     | >25%     | 1-4hr             | I               | No          | Yes | No  | 6  | 360               | 0    |            | 1.58     | 2.48 |
| ACE-4-twa | 24000   | High     | >25%     | 1-4hr             | I               | No          | Yes | No  | 13 | 480               | 0    |            | 2.70     | 4.81 |
| ACE-5-twa | 24000   | High     | >25%     | 1-4hr             | I               | No          | Yes | No  | 18 | 360               | 0    |            | 2.27     | 5.12 |
| BMP-1-twa | 14772   | High     | >25%     | 1-4hr             | I               | GV          | No  | No  | 41 | 240               | 4    |            | 5.02     | 3.75 |
| CYC-1-twa | 453     | Low      | >25%     | 1-4hr             | I               | No          | Yes | No  | 8  | 480               | 0    |            | 2.65     | 1.63 |
| ETEAM-60  | 24000   | High     | >25%     | <15min            | I               | EV          | Yes | No  | 7  | 250-450           | 2    |            | 0.23     | 2.68 |

| ID        | P75 (mg/m3) | P75 (ppm) | TRA value (mg/m3) | TRA value (ppm) | ratio P75/TRA | Revised setting (ind/pro) and PROC assignment                                                                                                                                                                                              | Revised RMM/OC/PPE assignment                                                                    | Valid for TRA comparison |
|-----------|-------------|-----------|-------------------|-----------------|---------------|--------------------------------------------------------------------------------------------------------------------------------------------------------------------------------------------------------------------------------------------|--------------------------------------------------------------------------------------------------|--------------------------|
| TCE-5-twa |             | 7.22      |                   | 3.00            | 2.41          |                                                                                                                                                                                                                                            | RPE changed from Yes to No (no indication that measurements have been performed inside the mask) | Yes                      |
| PCE-1-twa |             | 4.54      |                   | 3.00            | 1.51          |                                                                                                                                                                                                                                            |                                                                                                  | Yes                      |
| PCE-2-twa |             | 20.27     |                   | 1.25            | 16.22         | contextual information indicates PROC7 is more appropriate than PROC10 (ECHA R12: task description is "spraying"; coding in Stoffenmanager is "Handling of liquids at high pressure resulting in substantial generation of mist of spray") |                                                                                                  | Yes                      |
| PCE-3-twa |             | 1.65      |                   | 3.00            | 0.55          |                                                                                                                                                                                                                                            | RPE changed from Yes to No (no indication that measurements have been performed inside the mask) | Yes                      |
| PCE-4-twa |             | 35.64     |                   | 150.00          | 0.24          |                                                                                                                                                                                                                                            |                                                                                                  | Yes                      |
| PCE-5-twa |             | 24.05     |                   | 7.50            | 3.21          | contextual information indicates PROC7 is more appropriate than PROC10 (ECHA R12: task description is "spraying"; coding in Stoffenmanager is "Handling of liquids at high pressure resulting in substantial generation of mist of spray") |                                                                                                  | Yes                      |
| AA-1-twa  |             | 0.29      |                   | 4.20            | 0.07          | contextual information indicates PROC15 is more appropriate than PROC13 (ECHA R12: use of small quantities of chemicals)                                                                                                                   | RPE changed from Yes to No (no indication that measurements have been performed inside the mask) | Yes                      |
| AA-2-twa  |             | 0.44      |                   | 3.00            | 0.15          |                                                                                                                                                                                                                                            | RPE changed from Yes to No (no indication that measurements have been performed inside the mask) | Yes                      |
| ACE-1-twa |             | 5.93      |                   | 15.00           | 0.40          |                                                                                                                                                                                                                                            | RPE changed from Yes to No (no indication that measurements have been performed inside the mask) | Yes                      |
| ACE-2-twa |             | 5.58      |                   | 15.00           | 0.37          |                                                                                                                                                                                                                                            | RPE changed from Yes to No (no indication that measurements have been performed inside the mask) | Yes                      |
| ACE-3-twa |             | 2.91      |                   | 15.00           | 0.19          |                                                                                                                                                                                                                                            | RPE changed from Yes to No (no indication that measurements have been performed inside the mask) | Yes                      |
| ACE-4-twa |             | 7.78      |                   | 15.00           | 0.52          |                                                                                                                                                                                                                                            | RPE changed from Yes to No (no indication that measurements have been performed inside the mask) | Yes                      |
| ACE-5-twa |             | 6.82      |                   | 15.00           | 0.45          |                                                                                                                                                                                                                                            | RPE changed from Yes to No (no indication that measurements have been performed inside the mask) | Yes                      |
| BMP-1-twa |             | 12.23     |                   | 21.00           | 0.58          | contextual information indicates PROC15 is more appropriate than PROC13 (use of small quantities of chemicals)                                                                                                                             |                                                                                                  | Yes                      |
| CYC-1-twa |             | 3.68      |                   | 0.60            | 6.13          |                                                                                                                                                                                                                                            |                                                                                                  | Yes                      |
| ETEAM-60  |             | 0.46      |                   | 3.50            | 0.13          |                                                                                                                                                                                                                                            |                                                                                                  | Yes                      |

| Reference                                                | Additional info             | ID           | Category | Task description                                                       | Ind/Prof | PROC | Substance             | CAS no   | MW     |
|----------------------------------------------------------|-----------------------------|--------------|----------|------------------------------------------------------------------------|----------|------|-----------------------|----------|--------|
| Tongeren et.al; Ann Work Exp Health 2017; 61(8): 921-938 | ART data                    | ETEAM-65     | liquids  | Routine inspections of workers on a gasoline plant                     | Ind      | 2    | Benzene               | 71-43-2  | 78.11  |
| Tongeren et.al; Ann Work Exp Health 2017; 61(8): 921-938 | NIOSH (HETA 1997-0106-2770) | ETEAM-9585   | liquids  | raw material charging, product mixing, and dispensing into containers. | Ind      | 4    | Ethyl Benzene         | 100-41-4 | 106.17 |
| Tongeren et.al; Ann Work Exp Health 2017; 61(8): 921-938 | JOEH, 2013; 10(2)           | ETEAM-9594   | liquids  | Placing and removing batches of tantalum "slugs," into a dipping tank  | Ind      | 13   | Isoamyl Acetate (IAA) | 123-92-2 | 130.19 |
| Tongeren et.al; Ann Work Exp Health 2017; 61(8): 921-938 | NIOSH (HETA 2004-0372-3054) | ETEAM-10113a | liquids  | Extrusion of HDPE into flat sheets                                     | Ind      | 14   | Trichloroethylene     | 79-01-6  | 131.39 |
| Tongeren et.al; Ann Work Exp Health 2017; 61(8): 921-938 | NIOSH (HETA 2004-0372-3054) | ETEAM-10113b | liquids  | Extrusion of HDPE into flat sheets                                     | Ind      | 14   | Trichloroethylene     | 79-01-6  | 131.39 |
| Tongeren et.al; Ann Work Exp Health 2017; 61(8): 921-938 | NIOSH (HETA 2004-0372-3054) | ETEAM-10117  | liquids  | Extrusion of HDPE into flat sheets                                     | Ind      | 14   | Trichloroethylene     | 79-01-6  | 131.39 |
| Tongeren et.al; Ann Work Exp Health 2017; 61(8): 921-938 | NIOSH (HETA 2000-0410-2891) | ETEAM-10209a | liquids  | Sealing covers to cushions by using a spray adhesive                   | Ind      | 7    | 1-Bromopropane        | 106-94-5 | 122.99 |
| Tongeren et.al; Ann Work Exp Health 2017; 61(8): 921-938 | NIOSH (HETA 2000-0410-2891) | ETEAM-10209b | liquids  | Sealing covers to cushions by using a spray adhesive                   | Ind      | 7    | 1-Bromopropane        | 106-94-5 | 122.99 |
| Tongeren et.al; Ann Work Exp Health 2017; 61(8): 921-938 | NIOSH (HETA 1998-0153-2883) | ETEAM-10386  | liquids  | Sealing covers to cushions by using a spray adhesive                   | Ind      | 7    | 1-Bromopropane        | 106-94-5 | 122.99 |
| Tongeren et.al; Ann Work Exp Health 2017; 61(8): 921-938 | NIOSH (HETA 1998-0153-2883) | ETEAM-10392  | liquids  | Sealing covers to cushions by using a spray adhesive                   | Ind      | 7    | 1-Bromopropane        | 106-94-5 | 122.99 |
| Tongeren et.al; Ann Work Exp Health 2017; 61(8): 921-938 | NIOSH (HETA 1998-0153-2883) | ETEAM-10400  | liquids  | Sealing covers to cushions by using a spray adhesive                   | Ind      | 7    | 1-Bromopropane        | 106-94-5 | 122.99 |
| Tongeren et.al; Ann Work Exp Health 2017; 61(8): 921-938 | NIOSH (HETA 1998-0153-2883) | ETEAM-10401  | liquids  | Sealing covers to cushions by using a spray adhesive                   | Ind      | 7    | 1-Bromopropane        | 106-94-5 | 122.99 |
| Tongeren et.al; Ann Work Exp Health 2017; 61(8): 921-938 | NIOSH (HETA 1998-0153-2883) | ETEAM-10403  | liquids  | Sealing covers to cushions by using a spray adhesive                   | Ind      | 7    | 1-Bromopropane        | 106-94-5 | 122.99 |
| Tongeren et.al; Ann Work Exp Health 2017; 61(8): 921-938 | NIOSH (HETA 2000-0374-2998) | ETEAM-10418  | liquids  | Cleaning and coating of fuel cells                                     | Ind      | 7    | Butan-2-one           | 78-93-3  | 72.11  |
| SUVA report: 07.0324 and 08.0166                         | ETEAM reference: various    | SUVA-1       | liquids  | Activities with small quantities of chemicals                          | Ind      | 15   | Glutaraldehyde        | 111-30-8 | 100.12 |
| SUVA report: 07.0324 and 08.0166                         | ETEAM reference: various    | SUVA-2       | liquids  | Activities with small quantities of chemicals                          | Ind      | 15   | Glutaraldehyde        | 111-30-8 | 100.12 |

| ID           | VP [Pa]    | Fugacity | Conc (%) | Duration Category | Indoor/ Outdoor | Ventilation | LEV       | RPE | n   | Sample time (min)  | <LOD | GM (mg/m3) | GM (ppm) | GSD  |
|--------------|------------|----------|----------|-------------------|-----------------|-------------|-----------|-----|-----|--------------------|------|------------|----------|------|
| ETEAM-65     | 10000      | High     | 1-5%     | >4hr              | O               | Outdoors    | No        | No  | 19  | 60-225             | 0    |            | 0.01     | 3.51 |
| ETEAM-9585   | 952        | Medium   | >25%     | >4hr              | I               | EV          | No        | No  | 24  | 360-480            | 0    |            | 0.8      | 1.89 |
| ETEAM-9594   | <b>530</b> | Medium   |          |                   |                 |             |           |     |     |                    |      |            |          |      |
| ETEAM-10113a | 9900       | Medium   | >25%     | >4hr              | I               | GV          | No        | No  | 137 | 227-766            | 0    |            | 31.3     | 1.50 |
| ETEAM-10113b | 9900       | Medium   | >25%     | >4hr              | I               | GV          | No        | No  | 137 | 283-714            | 0    |            | 34       | 1.50 |
| ETEAM-10117  | 9900       | Medium   |          |                   |                 |             |           |     |     |                    |      |            |          |      |
| ETEAM-10209a | 14772      | High     | >25%     | >4hr              | I               | <b>GV</b>   | <b>No</b> | No  | 9   | 237-493            | 0    |            | 62.3     | 1.50 |
| ETEAM-10209b | 14772      | High     | >25%     | >4hr              | I               | <b>GV</b>   | <b>No</b> | No  | 34  | 296-498            | 0    |            | 18       | 1.40 |
| ETEAM-10386  | 14772      | High     | >25%     | >4hr              | I               | <b>GV</b>   | Yes       | No  | 7   | 484-492            | 0    |            | 17.48    | 1.41 |
| ETEAM-10392  | 14772      | High     | >25%     | >4hr              | I               | <b>GV</b>   | Yes       | No  | 11  | 375-481            | 0    |            | 28.59    | 1.57 |
| ETEAM-10400  | 14772      | High     | >25%     | >4hr              | I               | No          | <b>No</b> | No  | 20  | 364-489            | 0    |            | 149.8    | 1.29 |
| ETEAM-10401  | 14772      | High     | >25%     | >4hr              | I               | No          | <b>No</b> | No  | 15  | 126-488            | 0    |            | 188.89   | 1.23 |
| ETEAM-10403  | 14772      | High     | >25%     | >4hr              | I               | No          | <b>No</b> | No  | 21  | 497-513            | 0    |            | 188.28   | 1.35 |
| ETEAM-10418  | 10400      | High     | 5-25%    | >4hr              | I               | No          | No        | No  | 7   | 453-494            | 0    |            | 23.89    | 1.67 |
| SUVA-1       | <b>70</b>  | Low      | 1-5%     | >4hr              | I               | No          | No        | No  | 26  | 15-131 (mean > 30) | 0    |            | 0.010    | 4.12 |
| SUVA-2       | <b>70</b>  | Low      | 1-5%     | >4hr              | I               | No          | Yes       | No  | 12  | 15-190 (mean>30)   | 0    |            | 0.013    | 4.16 |



| ID           | P75 (mg/m3) | P75 (ppm) | TRA value (mg/m3) | TRA value (ppm) | ratio P75/TRA | Revised setting (ind/pro) and PROC assignment                                                                                                               | Revised RMM/OC/PPE assignment                                                                                                                                                    | Valid for TRA comparison |
|--------------|-------------|-----------|-------------------|-----------------|---------------|-------------------------------------------------------------------------------------------------------------------------------------------------------------|----------------------------------------------------------------------------------------------------------------------------------------------------------------------------------|--------------------------|
| ETEAM-65     |             | 0.02      |                   | 0.70            | 0.03          | contextual information indicates PROC2 is more appropriate than PROC4 (ECHA R12: closed proces equipment; limited opportunity for exposure)                 |                                                                                                                                                                                  | Yes                      |
| ETEAM-9585   |             | 1.23      |                   | 6.00            | 0.20          | contextual information indicates PROC4 is more appropriate than PROC5 (ECHA R12: no multistage proces; opportunity for exposure but no significant contact) |                                                                                                                                                                                  | Yes                      |
| ETEAM-9594   |             |           |                   |                 |               | measured data is provided for workers who conducted several different tasks; not possible to assign one PROC                                                |                                                                                                                                                                                  | No                       |
| ETEAM-10113a |             | 41.00     |                   | 35.00           | 1.17          |                                                                                                                                                             |                                                                                                                                                                                  | Yes                      |
| ETEAM-10113b |             | 45.30     |                   | 35.00           | 1.29          |                                                                                                                                                             |                                                                                                                                                                                  | Yes                      |
| ETEAM-10117  |             |           |                   |                 |               | measured data is provided for workers who conducted several different tasks; not possible to assign one PROC                                                |                                                                                                                                                                                  | No                       |
| ETEAM-10209a |             | 83.40     |                   | 350.00          | 0.24          |                                                                                                                                                             | ventilation changed from EV to GV (information on ventilation does not justify EV (> 5 ach)); LEV changed from Yes to No (information in report indicates no or inefficient LEV) | Yes                      |
| ETEAM-10209b |             | 22.10     |                   | 350.00          | 0.06          |                                                                                                                                                             | ventilation changed from EV to GV (information on ventilation does not justify EV (> 5 ach)); LEV changed from Yes to No (information in report indicates no or inefficient LEV) | Yes                      |
| ETEAM-10386  |             | 22.07     |                   | 17.50           | 1.26          |                                                                                                                                                             | ventilation changed from EV to GV (information on ventilation does not justify EV (> 5 ach))                                                                                     | Yes                      |
| ETEAM-10392  |             | 38.71     |                   | 17.50           | 2.21          |                                                                                                                                                             | ventilation changed from EV to GV (information on ventilation does not justify EV (> 5 ach))                                                                                     | Yes                      |
| ETEAM-10400  |             | 230.63    |                   | 500.00          | 0.46          |                                                                                                                                                             | LEV changed from Yes to No (information in report indicates no or inefficient LEV)                                                                                               | Yes                      |
| ETEAM-10401  |             | 217.38    |                   | 500.00          | 0.43          |                                                                                                                                                             | LEV changed from Yes to No (information in report indicates no or inefficient LEV)                                                                                               | Yes                      |
| ETEAM-10403  |             | 230.63    |                   | 500.00          | 0.46          |                                                                                                                                                             | LEV changed from Yes to No (information in report indicates no or inefficient LEV)                                                                                               | Yes                      |
| ETEAM-10418  |             | 33.73     |                   | 300.00          | 0.11          |                                                                                                                                                             |                                                                                                                                                                                  | Yes                      |
| SUVA-1       |             | 0.03      |                   | 1.00            | 0.03          |                                                                                                                                                             |                                                                                                                                                                                  | Yes                      |
| SUVA-2       |             | 0.03      |                   | 0.10            | 0.34          |                                                                                                                                                             |                                                                                                                                                                                  | Yes                      |

| Reference                                                | Additional info                                | ID         | Category | Task description                                                   | Ind/Prof | PROC | Substance                           | CAS no   | MW     |
|----------------------------------------------------------|------------------------------------------------|------------|----------|--------------------------------------------------------------------|----------|------|-------------------------------------|----------|--------|
| SUVA report: 10.0095 and 11.0153                         | ETEAM reference: various                       | SUVA-3     | liquids  | Activities with small quantities of chemicals                      | Ind      | 15   | Glutaraldehyde                      | 111-30-8 | 100.12 |
| SUVA report: 10.0095 and 11.0153                         | ETEAM reference: various                       | SUVA-4     | liquids  | Activities with small quantities of chemicals                      | Ind      | 15   | Glutaraldehyde                      | 111-30-8 | 100.12 |
| SUVA report: 10.0162/5.0 and 09.0050/5.0                 | ETEAM reference 10787                          | SUVA-6     | liquids  | Polyester casting machine / production                             | Ind      | 24   | Heptane isomere (without n-heptane) | 142-82-5 | 100.2  |
| SUVA report: 07.0306/5.0                                 | ETEAM reference 10796/ 10797                   | SUVA-7     | liquids  | Batch-wise production of coatings at painting stations             | Ind      | 5    | Toluene                             | 108-88-3 | 92.1   |
| Tongeren et.al; Ann Work Exp Health 2017; 61(8): 921-938 | ART data                                       | ETEAM-57   | liquids  | Bottom loading of tank-trucks with gasoline                        | Ind      | 8b   | Benzene                             | 71-43-2  | 78.11  |
| Tongeren et.al; Ann Work Exp Health 2017; 61(8): 921-938 | ART data                                       | ETEAM-58   | liquids  | Top-loading of methylethylketon in tanker-trucks                   | Ind      | 8b   | Butan-2-one                         | 78-93-3  | 72.11  |
| Tongeren et.al; Ann Work Exp Health 2017; 61(8): 921-938 | ART data                                       | ETEAM-59   | liquids  | Top-loading of gasoline in tanker-trucks                           | Ind      | 8b   | Benzene                             | 71-43-2  | 78.11  |
| Tongeren et.al; Ann Work Exp Health 2017; 61(8): 921-938 | ART data                                       | ETEAM-63   | liquids  | Filling of drums with gasoline                                     | Ind      | 8b   | Benzene                             | 71-43-2  | 78.11  |
| Tongeren et.al; Ann Work Exp Health 2017; 61(8): 921-938 | ART data                                       | ETEAM-67   | liquids  | Refueling of vehicles with gasoline                                | Pro      | 8b   | Benzene                             | 71-43-2  | 78.11  |
| Tongeren et.al; Ann Work Exp Health 2017; 61(8): 921-938 | ART data                                       | ETEAM-68   | liquids  | Collection of samples of gasoline                                  | Ind      | 9    | Benzene                             | 71-43-2  | 78.11  |
| Tongeren et.al; Ann Work Exp Health 2017; 61(8): 921-938 | ART data                                       | ETEAM-71   | liquids  | Laminating bumpers and panels using either soft rollers or brushes | Ind      | 10   | Styrene                             | 100-42-5 | 104.15 |
| Tongeren et.al; Ann Work Exp Health 2017; 61(8): 921-938 | BAUA data (study F1660; ETEAM codes 6911-6961) | ETEAM-75   | liquids  | Cleaning of glasses in opticians shops                             | Pro      | 19   | Ethanol                             | 64-17-5  | 46.07  |
| Concawe report 13-18 (suppl. Table S1.12)                | Auffarth                                       | ETEAM-86   | liquids  | Draining of fuel from tank of cars to be scrapped (pre-1.1.2000)   | Pro      | 8b   | Benzene                             | 71-43-2  | 78.11  |
| Concawe report 13-18 (suppl. Table S1.12)                | Auffarth                                       | ETEAM-87   | liquids  | Draining of fuel from tank of cars to be scrapped (post-1.1.2000)  | Pro      | 8b   | Benzene                             | 71-43-2  | 78.11  |
| Lee et.al, Ann Occup Hyg, 2009; 53(5): 463-474           |                                                | ETEAM-9570 | liquids  | Cleaning, printing and printpreparation in a printing shop         | Pro      | 10   | Acetone                             | 67-64-1  | 58.08  |
| Lee et.al, Ann Occup Hyg, 2009; 53(5): 463-474           |                                                | ETEAM-9573 | liquids  | Cleaning, printing and printpreparation in a printing shop         | Pro      | 10   | Propan-2-ol                         | 67-63-0  | 60.1   |

| ID         | VP [Pa] | Fugacity | Conc (%) | Duration Category | Indoor/ Outdoor | Ventilation | LEV | RPE | n  | Sample time (min)  | <LOD | GM (mg/m3) | GM (ppm) | GSD   |
|------------|---------|----------|----------|-------------------|-----------------|-------------|-----|-----|----|--------------------|------|------------|----------|-------|
| SUVA-3     | 70      | Low      | 1-5%     | >4hr              | I               | No          | No  | No  | 17 | 26-120             | 2    |            | 0.003    | 4.60  |
| SUVA-4     | 70      | Low      | 1-5%     | >4hr              | I               | No          | Yes | No  | 9  | 119-188            | 0    |            | 0.002    | 2.55  |
| SUVA-6     | 15700   | High     |          |                   |                 |             |     |     |    |                    |      |            |          |       |
| SUVA-7     | 3089    | Medium   | >25%     | >4hr              | I               | No          | No  | No  | 6  | 94-142             | 0    |            | 55.83    | 1.55  |
| ETEAM-57   | 10000   | High     | 1-5%     | >4hr              | O               | Outdoors    | No  | No  | 29 | 23-300 (mean>30)   | 0    |            | 0.06     | 2.80  |
| ETEAM-58   | 10400   | High     | >25%     | 1-4hr             | O               | Outdoors    | Yes | No  | 8  | 150-450            | 0    |            | 1.04     | 3.33  |
| ETEAM-59   | 10000   | High     | 1-5%     | >4hr              | O               | Outdoors    | No  | No  | 24 | 100-300            | 0    |            | 0.28     | 3.36  |
| ETEAM-63   | 10000   | High     | 1-5%     | >4hr              | O               | Outdoors    | No  | No  | 23 | 15-600 (mean>30)   | 0    |            | 0.2      | 2.26  |
| ETEAM-67   | 10000   | High     | 1-5%     | >4hr              | O               | Outdoors    | No  | No  | 88 | 10-500 (mean>30)   | 0    |            | 0.04     | 4.91  |
| ETEAM-68   | 10000   | High     | 1-5%     | >4hr              | O               | Outdoors    | No  | No  | 7  | 15-60 (mean>30)    | 0    |            | 0.01     | 7.36  |
| ETEAM-71   | 667     | Medium   | >25%     | >4hr              | I               | GV          | No  | No  | 9  | 17-250 (mean>30)   | 0    |            | 13.6     | 2.22  |
| ETEAM-75   | 5726    | Medium   | >25%     | >4hr              | I               | GV          | No  | No  | 14 | 120-255            | 0    |            | 23.91    | 2.84  |
| ETEAM-86   | 10000   | High     | 1-5%     | >4hr              | I               | GV          | No  | No  | 19 | 140 min to 417 min | 0    |            | 0.16     | 2.677 |
| ETEAM-87   | 10000   | High     | <1%      | >4hr              | I               | GV          | No  | No  | 16 | 126 min to 444 min | 0    |            | 0.0646   | 3.109 |
| ETEAM-9570 | 24000   | High     | >25%     | 1-4hr             | I               | GV          | No  | No  | 30 | 15-82 (mean>30)    | 4    |            | 31.46    | 2.09  |
| ETEAM-9573 | 4400    | Medium   | >25%     | 1-4hr             | I               | GV          | No  | No  | 73 | 15-148 (mean>30)   | 0    |            | 23.76    | 1.48  |

| ID         | P75 (mg/m3) | P75 (ppm) | TRA value (mg/m3) | TRA value (ppm) | ratio P75/TRA | Revised setting (ind/pro) and PROC assignment                                                                                         | Revised RMM/OC/PPE assignment                                              | Valid for TRA comparison |
|------------|-------------|-----------|-------------------|-----------------|---------------|---------------------------------------------------------------------------------------------------------------------------------------|----------------------------------------------------------------------------|--------------------------|
| SUVA-3     |             | 0.01      |                   | 1.00            | 0.01          |                                                                                                                                       |                                                                            | Yes                      |
| SUVA-4     |             | 0.00      |                   | 0.10            | 0.03          |                                                                                                                                       |                                                                            | Yes                      |
| SUVA-6     |             |           |                   |                 |               | measured data is provided for workers who conducted several different tasks; not possible to assign one PROC                          |                                                                            | No                       |
| SUVA-7     |             | 75.02     |                   | 50.00           | 1.50          | contextual information indicates PROC5 is more appropriate than PROC10 (ECHA R12: primarily mixing, limited coating)                  |                                                                            | Yes                      |
| ETEAM-57   |             | 0.12      |                   | 3.50            | 0.03          |                                                                                                                                       |                                                                            | Yes                      |
| ETEAM-58   |             | 2.33      |                   | 6.30            | 0.37          |                                                                                                                                       | LEV changed from No to Yes (vapour recovery system)                        | Yes                      |
| ETEAM-59   |             | 0.64      |                   | 3.50            | 0.18          |                                                                                                                                       |                                                                            | Yes                      |
| ETEAM-63   |             | 0.34      |                   | 3.50            | 0.10          |                                                                                                                                       |                                                                            | Yes                      |
| ETEAM-67   |             | 0.11      |                   | 7.00            | 0.02          |                                                                                                                                       |                                                                            | Yes                      |
| ETEAM-68   |             | 0.03      |                   | 7.00            | 0.00          |                                                                                                                                       |                                                                            | Yes                      |
| ETEAM-71   |             | 23.27     |                   | 35.00           | 0.66          |                                                                                                                                       |                                                                            | Yes                      |
| ETEAM-75   |             | 48.32     |                   | 70.00           | 0.69          |                                                                                                                                       | duration changed from 1-4hr to >4hr (inappropriate use of duration factor) | Yes                      |
| ETEAM-86   |             | 0.31      |                   | 35.00           | 0.01          | contextual information indicates PROC8b is more appropriate than PROC9 (ECHA R12: dedicated equipment but no dedicated filling line). |                                                                            | Yes                      |
| ETEAM-87   |             | 0.14      |                   | 17.50           | 0.01          | contextual information indicates PROC8b is more appropriate than PROC9 (ECHA R12: dedicated equipment but no dedicated filling line). |                                                                            | Yes                      |
| ETEAM-9570 |             | 51.78     |                   | 210.00          | 0.25          | contextual information indicates professional use is more appropriate for this type of activity and setting than industrial use       |                                                                            | Yes                      |
| ETEAM-9573 |             | 30.88     |                   | 42.00           | 0.74          | contextual information indicates professional use is more appropriate for this type of activity and setting than industrial use       |                                                                            | Yes                      |

| Reference                                                | Additional info                            | ID          | Category | Task description                                                                                                                                                                                           | Ind/Prof | PROC | Substance                   | CAS no    | MW     |
|----------------------------------------------------------|--------------------------------------------|-------------|----------|------------------------------------------------------------------------------------------------------------------------------------------------------------------------------------------------------------|----------|------|-----------------------------|-----------|--------|
| Tongeren et.al; Ann Work Exp Health 2017; 61(8): 921-938 | NIOSH (HETA 1997-0106-2770)                | ETEAM-9591  | liquids  | Manual bucket washing/cleaning                                                                                                                                                                             | Ind      | 19   | Butan-2-one                 | 78-93-3   | 72.11  |
| Tongeren et.al; Ann Work Exp Health 2017; 61(8): 921-938 | NIOSH (HETA 96-0145-2684)                  | ETEAM-9830  | liquids  | Rigid plastic articles being manufactured into items including figurines, wall plaques, boxes, and picture frames, using polyester resin                                                                   | Pro      | 9    | Styrene                     | 100-42-5  | 104.15 |
| Tongeren et.al; Ann Work Exp Health 2017; 61(8): 921-938 | NIOSH (HETA 1995-0209-2515)                | ETEAM-9879  | liquids  | Gluing insoles in shoes                                                                                                                                                                                    | Ind      | 10   | Heptane                     | 142-82-5  | 100.2  |
| Tongeren et.al; Ann Work Exp Health 2017; 61(8): 921-938 | NIOSH (HETA 1994-0220-2526)                | ETEAM-9885  | liquids  | Fuelling by service station attendants at two service stations                                                                                                                                             | Pro      | 8b   | Methyl tert-Butyl ether     | 1634-04-4 | 88.15  |
| Tongeren et.al; Ann Work Exp Health 2017; 61(8): 921-938 | NIOSH (HETA 99-0163-2771)                  | ETEAM-9899  | liquids  | Drywall hangers using adhesive to affix drywall sheets to wooden wall studs, joists, and rafters in residential homes                                                                                      | Pro      | 10   | N-hexane                    | 110-54-3  | 86.18  |
| Tongeren et.al; Ann Work Exp Health 2017; 61(8): 921-938 | NIOSH (HETA 2003-0203-2952)                | ETEAM-10368 | liquids  | Production of direct mail flyers and providing printing, binding, and distribution services                                                                                                                | Ind      | 8a   | Trichloroethylene           | 79-01-6   | 131.39 |
| Tongeren et.al; Ann Work Exp Health 2017; 61(8): 921-938 | NIOSH (HETA 2002-0379-2901)                | ETEAM-10380 | liquids  | Flexographic printing for consumer labelling by press operators, rewinder operators, and press assistants (mainly transfer of inks and print additives)                                                    | Ind      | 8a   | Dimethylaminoethanol (DMAE) | 108-01-0  | 89.14  |
| Tongeren et.al; Ann Work Exp Health 2017; 61(8): 921-938 | NIOSH (HETA 2002-0379-2901)                | ETEAM-10385 | liquids  | Flexographic printing for consumer labelling by press operators, rewinder operators, and press assistants (mainly transfer of inks and print additives)                                                    | Ind      | 8a   | Dimethylaminoethanol (DMAE) | 108-01-0  | 89.14  |
| Tongeren et.al; Ann Work Exp Health 2017; 61(8): 921-938 | NIOSH (HETA 2000-0374-2998)                | ETEAM-10411 | liquids  | Manufacture of aircraft fuel tanks and other products by manual assembly of thin layers of fabric over or inside of a pre-formed mold, using polyurethane adhesives (manually applied by brush or sprayed) | Ind      | 10   | Acetone                     | 67-64-1   | 58.08  |
| SUVA database report: 05.0223/5.0                        | ETEAM reference 10774                      | SUVA-8      | liquids  | Transfer of gasoline. Emptying tanker in gas station                                                                                                                                                       | Ind      | 8b   | Pentane                     | 109-66-0  | 72     |
| SUVA database report: 06.0226/5.4                        | ETEAM reference 10775/ 10782/ 10803/ 10809 | SUVA-9      | liquids  | Production of gift-wrapping paper using printing presses                                                                                                                                                   | Ind      | 10   | Ethanol                     | 64-17-5   | 46.07  |
| Lee et.al; Ann Work Exp Health 2019; 63(2): 218-229      | additional ES info obtained from Emily Lee | NIOSH-22    | liquids  | Batch-making                                                                                                                                                                                               | Ind      | 5    | N-butyl acetate bulk        | 123-86-4  | 116.16 |
| Lee et.al; Ann Work Exp Health 2019; 63(2): 218-229      | additional ES info obtained from Emily Lee | NIOSH-37    | liquids  | Batch-making                                                                                                                                                                                               | Ind      | 5    | Ethyl Benzene               | 100-41-4  | 106.17 |
| Lee et.al; Ann Work Exp Health 2019; 63(2): 218-229      | additional ES info obtained from Emily Lee | NIOSH-28    | liquids  | Aircraft Refurbishment                                                                                                                                                                                     | Ind      | 10   | PCBTF                       | 98-56-6   | 180.56 |
| Lee et.al; Ann Work Exp Health 2019; 63(2): 218-229      | additional ES info obtained from Emily Lee | NIOSH-41    | liquids  | Bucket washing                                                                                                                                                                                             | Ind      | 10   | Acetone                     | 67-64-1   | 58.1   |
| Lee et.al; Ann Work Exp Health 2019; 63(2): 218-229      | additional ES info obtained from Emily Lee | NIOSH-48    | liquids  | Glue application-Outside                                                                                                                                                                                   | Ind      | 10   | Styrene                     | 100-42-5  | 104.15 |

| ID          | VP [Pa]      | Fugacity    | Conc (%)       | Duration Category | Indoor/ Outdoor | Ventilation | LEV        | RPE | n  | Sample time (min) | <LOD    | GM (mg/m3) | GM (ppm)      | GSD         |
|-------------|--------------|-------------|----------------|-------------------|-----------------|-------------|------------|-----|----|-------------------|---------|------------|---------------|-------------|
| ETEAM-9591  | 10400        | High        | 5-25%          | >4hr              | I               | EV          | Yes        | No  | 18 | 360-480           | 0       |            | 3.3           | 4.31        |
| ETEAM-9830  | 666          | Medium      |                |                   |                 |             |            |     |    |                   |         |            |               |             |
| ETEAM-9879  | <b>5330</b>  | Medium      | >25%           | >4hr              | I               | <b>No</b>   | <b>No</b>  | No  | 7  | 510               | 0       |            | <b>186.71</b> | <b>1.43</b> |
| ETEAM-9885  | 33000        | High        | 5-25%          | <b>1-4hr</b>      | O               | Outdoors    | <b>Yes</b> | No  | 10 | 171-454           | 0       |            | <b>0.365</b>  | <b>2.43</b> |
| ETEAM-9899  | <b>20060</b> | High        | >25%           | >4hr              | I               | GV          | No         | No  | 6  | 298-354           | 0       |            | <b>16.95</b>  | <b>1.47</b> |
| ETEAM-10368 | 9900         | Medium      |                |                   |                 |             |            |     |    |                   |         |            |               |             |
| ETEAM-10380 | <b>816</b>   | Medium      | >25%           | >4hr              | I               | GV          | Yes        | No  | 19 | 250-756           | 5       |            | <b>0.195</b>  | <b>2.19</b> |
| ETEAM-10385 | <b>816</b>   | Medium      | >25%           | >4hr              | I               | GV          | Yes        | No  | 13 | 291-611           | 0       |            | <b>0.818</b>  | <b>1.39</b> |
| ETEAM-10411 | 24000        | High        | >25%           | >4hr              | I               | No          | No         | No  | 29 | 279-492           | 0       |            | <b>12.07</b>  | <b>2.84</b> |
| SUVA-8      | <b>68500</b> | High        | 1-5%           | >4hr              | O               | Outdoors    | No         | No  | 6  | 22-131 (mean>30)  | 0       |            | <b>35.99</b>  | <b>1.48</b> |
| SUVA-9      | 5726         | <b>High</b> | >25%           | >4hr              | I               | No          | Yes        | No  | 8  | 96-273            | 0       |            | <b>40.37</b>  | <b>1.36</b> |
| NIOSH-22    | 1120         | Medium      | >25%           | >4hr              | I               | <b>GV</b>   | No         | No  | 8  | 258-417           | No info |            | <b>13.73</b>  | 1.62        |
| NIOSH-37    | 952          | Medium      | >25%           | >4hr              | I               | GV          | No         | No  | 24 | 480               | No info |            | <b>0.79</b>   | 1.91        |
| NIOSH-28    | <b>1000</b>  | Medium      | >25%           | >4hr              | I               | <b>GV</b>   | Yes        | No  | 21 | 75-407            | No info |            | <b>1.84</b>   | 3.19        |
| NIOSH-41    | 24000        | High        |                |                   |                 |             |            |     |    |                   |         |            |               |             |
| NIOSH-48    | 667          | Medium      | <b>&gt;25%</b> | >4hr              | I               | GV          | No         | No  | 6  | 450-627           | No info |            | <b>20.11</b>  | 1.47        |

| ID          | P75 (mg/m3) | P75 (ppm) | TRA value (mg/m3) | TRA value (ppm) | ratio P75/TRA | Revised setting (ind/pro) and PROC assignment                                                                                                  | Revised RMM/OC/PPE assignment                                                                                                                                                   | Valid for TRA comparison |
|-------------|-------------|-----------|-------------------|-----------------|---------------|------------------------------------------------------------------------------------------------------------------------------------------------|---------------------------------------------------------------------------------------------------------------------------------------------------------------------------------|--------------------------|
| ETEAM-9591  |             | 8.83      |                   | 9.00            | 0.98          | contextual information indicates PROC19 is more appropriate than PROC8b (ECHA R12: no transfer task; mainly manual cleaning, intimate contact) |                                                                                                                                                                                 | Yes                      |
| ETEAM-9830  |             |           |                   |                 |               | different tasks and very unclear descriptions for ventilation and LEV; not possible to generate a TRA estimate                                 |                                                                                                                                                                                 | No                       |
| ETEAM-9879  |             | 237.82    |                   | 50.00           | 4.76          |                                                                                                                                                | ventilation changed from GV to No (information in report indicates inefficient ventilation); LEV changed from Yes to No (information in report indicates no or inefficient LEV) | Yes                      |
| ETEAM-9885  |             | 0.66      |                   | 3.15            | 0.21          |                                                                                                                                                | duration changed from >4hr to 1-4hr (task not performed during full shift); LEV changed from No to Yes (vapour recovery system)                                                 | Yes                      |
| ETEAM-9899  |             | 21.90     |                   | 350.00          | 0.06          |                                                                                                                                                |                                                                                                                                                                                 | Yes                      |
| ETEAM-10368 |             |           |                   |                 |               | measured data is provided for workers who conducted several different tasks; not possible to assign one PROC                                   |                                                                                                                                                                                 | No                       |
| ETEAM-10380 |             | 0.33      |                   | 3.50            | 0.09          | contextual information indicates PROC8a is more appropriate than PROC8b (ECHA R12: mainly transfer to open containers, not dedicated)          |                                                                                                                                                                                 | Yes                      |
| ETEAM-10385 |             | 1.02      |                   | 3.50            | 0.29          | contextual information indicates PROC8a is more appropriate than PROC8b (ECHA R12: mainly transfer to open containers, not dedicated)          |                                                                                                                                                                                 | Yes                      |
| ETEAM-10411 |             | 24.37     |                   | 250.00          | 0.10          |                                                                                                                                                |                                                                                                                                                                                 | Yes                      |
| SUVA-8      |             | 46.87     |                   | 21.00           | 2.23          | contextual information indicates PROC8b is more appropriate than PROC8a (ECHA R12: transfer, dedicated equipment)                              |                                                                                                                                                                                 | Yes                      |
| SUVA-9      |             | 49.67     |                   | 25.00           | 1.99          |                                                                                                                                                | fugacity changed from medium to high (elevated temperature)                                                                                                                     | Yes                      |
| NIOSH-22    |             | 19.00     |                   | 35.00           | 0.54          |                                                                                                                                                | ventilation changed from EV to GV (information on ventilation does not justify EV (> 5 ach))                                                                                    | Yes                      |
| NIOSH-37    |             | 1.23      |                   | 35.00           | 0.04          |                                                                                                                                                |                                                                                                                                                                                 | Yes                      |
| NIOSH-28    |             | 4.01      |                   | 3.50            | 1.15          |                                                                                                                                                | ventilation changed from EV to GV (information on ventilation does not justify EV (> 5 ach))                                                                                    | Yes                      |
| NIOSH-41    |             |           |                   |                 |               | measured data is provided for workers who conducted several different tasks; not possible to assign one PROC                                   |                                                                                                                                                                                 | No                       |
| NIOSH-48    |             | 26.08     |                   | 35.00           | 0.75          |                                                                                                                                                | concentration changed from 1-5% to >25% (lay-up activity; concentration typical in range 30-40%)                                                                                | Yes                      |

| Reference                                                | Additional info                            | ID          | Category | Task description                                                                                                                 | Ind/Prof   | PROC      | Substance          | CAS no     | MW     |
|----------------------------------------------------------|--------------------------------------------|-------------|----------|----------------------------------------------------------------------------------------------------------------------------------|------------|-----------|--------------------|------------|--------|
| Lee et.al; Ann Work Exp Health 2019; 63(2): 218-229      | additional ES info obtained from Emily Lee | NIOSH-53    | liquids  | Blade Finishing and Assembly                                                                                                     | Ind        | 10        | Styrene            | 100-42-5   | 104.15 |
| Lee et.al; Ann Work Exp Health 2019; 63(2): 218-229      | additional ES info obtained from Emily Lee | NIOSH-57    | liquids  | Printing task                                                                                                                    | Ind        | 10        | Isopropanol        | 67-63-0    | 60.09  |
| Lee et.al; Ann Work Exp Health 2019; 63(2): 218-229      | additional ES info obtained from Emily Lee | NIOSH-58    | liquids  | Print Process                                                                                                                    | Ind        | 10        | Isopropanol        | 67-63-0    | 60.09  |
| Lee et.al; Ann Work Exp Health 2019; 63(2): 218-229      | additional ES info obtained from Emily Lee | NIOSH-32    | liquids  | Sample preparation in histology lab                                                                                              | <b>Ind</b> | <b>15</b> | Ethanol            | 64-17-5    | 46.07  |
| Lee et.al; Ann Work Exp Health 2019; 63(2): 218-229      | additional ES info obtained from Emily Lee | NIOSH-33    | liquids  | Sample prep in pathology lab                                                                                                     | <b>Ind</b> | <b>15</b> | Ethanol            | 64-17-5    | 46.07  |
| Lee et.al; Ann Work Exp Health 2019; 63(2): 218-229      | additional ES info obtained from Emily Lee | NIOSH-35    | liquids  | Sample preparation in pathology lab –Physician Assistant                                                                         | <b>Ind</b> | <b>15</b> | Formaldehyde       | 50-00-0    | 30.03  |
| Lee et.al; Ann Work Exp Health 2019; 63(2): 218-229      | additional ES info obtained from Emily Lee | NIOSH-30    | liquids  | Denture Repairer                                                                                                                 | Pro        | 15        | Methylmethacrylate | 80-62-6    | 100.12 |
| Tongeren et.al; Ann Work Exp Health 2017; 61(8): 921-938 | ART data                                   | ETEAM-2     | solids   | Spraying of antifouling paint to ship hulls                                                                                      | Pro        | 11        | Copper (I) oxide   | 1317-38-0  | 79.5   |
| Tongeren et.al; Ann Work Exp Health 2017; 61(8): 921-938 | ART data                                   | ETEAM-42    | solids   | Scooping of coal with scoops and brooms                                                                                          | <b>Pro</b> | <b>19</b> | Inhalable dust     |            |        |
| Tongeren et.al; Ann Work Exp Health 2017; 61(8): 921-938 | ART data                                   | ETEAM-46    | solids   | Tabletting process in the pharmaceutical industry                                                                                | Ind        | 14        | Amoxicillin        | 26787-78-0 | 418    |
| Tongeren et.al; Ann Work Exp Health 2017; 61(8): 921-938 | ART data                                   | ETEAM-54    | solids   | Unloading of a ship hold in the transshipment industry (using a bobcat or truck)                                                 | Ind        | 8a        | Aluminium oxide    | 1344-28-1  | 102    |
| Tongeren et.al; Ann Work Exp Health 2017; 61(8): 921-938 | ETEAM, 2017, solids                        | ETEAM-9941  | solids   | Ccleaning, repair, painting, and final shipment of metallic castings                                                             | Ind        | 24        | Copper             | 7440-50-8  | 63.5   |
| Tongeren et.al; Ann Work Exp Health 2017; 61(8): 921-938 | ETEAM, 2017, solids                        | ETEAM-10043 | solids   | Ccleaning, repair, painting, and final shipment of metallic castings                                                             | Ind        | 24        | Aluminium          | 7429-90-5  | 26.98  |
| Tongeren et.al; Ann Work Exp Health 2017; 61(8): 921-938 | NIOSH (HETA 1993-0035-2481)                | ETEAM-10110 | solids   | Welding mild steel and painting welded structures during the manufacture of pre-engineered steel buildings                       | Ind        | 25        | Iron Oxide         | 1309-37-1  | 159.7  |
| SUVA database report: 12.0113/2.0                        | ETEAM reference 10743/10744                | SUVA-10     | solids   | Turbines made of alloyed steel are tested for imbalances. Detected imbalances are corrected by removal of material with grinding | Ind        | 24        | Chromium           | 7440-47-3  | 52     |



| ID          | VP [Pa]   | Fugacity | Conc (%)    | Duration Category | Indoor/ Outdoor | Ventilation | LEV | RPE | n  | Sample time (min) | <LOD    | GM (mg/m3) | GM (ppm) | GSD   |
|-------------|-----------|----------|-------------|-------------------|-----------------|-------------|-----|-----|----|-------------------|---------|------------|----------|-------|
| NIOSH-53    | 667       | Medium   | >25%        | <b>1-4hr</b>      | I               | GV          | No  | No  | 12 | 568-686           | No info |            | 5.91     | 1.80  |
| NIOSH-57    | 4400      | Medium   | >25%        | >4hr              | I               | GV          | No  | No  | 13 | 320-572           | No info |            | 23.68    | 1.44  |
| NIOSH-58    | 4400      | Medium   | >25%        | >4hr              | I               | GV          | No  | No  | 17 | 193-517           | No info |            | 13.88    | 3.01  |
| NIOSH-32    | 5726      | Medium   | >25%        | 15min-1hr         | I               | GV          | No  | No  | 8  | 225-387           | No info |            | 4.30     | 2.07  |
| NIOSH-33    | 5726      | Medium   | >25%        | 1-4hr             | I               | GV          | No  | No  | 15 | 424-485           | No info |            | 2.40     | 1.88  |
| NIOSH-35    | <b>41</b> | Low      | >25%        | 1-4hr             | I               | GV          | Yes | No  | 10 | 424-485           | No info |            | 0.02     | 1.96  |
| NIOSH-30    | 3700      | Medium   | >25%        | <b>1-4hr</b>      | I               | GV          | No  | No  | 10 | 199-502           | No info |            | 0.59     | 1.86  |
| ETEAM-2     |           | Medium   | >25%        | >4hr              | O               | Outdoors    | No  | No  | 21 | 76-346            | 2       | 1.15       |          | 3.15  |
| ETEAM-42    |           | Medium   | >25%        | >4hr              | I               | No          | No  | No  | 8  | 104-242           | 0       | 2.18       |          | 1.45  |
| ETEAM-46    |           | Medium   | >25%        | >4hr              | I               | EV          | No  | No  | 11 | 10-129 (mean>30)  | 0       | 0.99       |          | 2.24  |
| ETEAM-54    |           | High     |             |                   |                 |             |     |     |    |                   |         |            |          |       |
| ETEAM-9941  |           | Low      | <b>1-5%</b> | >4hr              | I               | GV          | No  | No  | 15 | 450-481           | 0       | 0.04       |          | 1.90  |
| ETEAM-10043 |           | Low      | <b>1-5%</b> | >4hr              | I               | GV          | No  | No  | 15 | 450-481           | 0       | 0.09       |          | 2.06  |
| ETEAM-10110 |           | Low      | >25%        | >4hr              | I               | GV          | No  | No  | 6  | 394-458           | 0       | 2.604      |          | 1.433 |
| SUVA-10     |           | Low      | 5-25%       | >4hr              | I               | No          | Yes | No  | 6  | 74-118            | 0       | 0.03       |          | 1.78  |

| ID          | P75 (mg/m3) | P75 (ppm) | TRA value (mg/m3) | TRA value (ppm) | ratio P75/TRA | Revised setting (ind/pro) and PROC assignment                                                                                                                                                                                                                                         | Revised RMM/OC/PPE assignment                                                                   | Valid for TRA comparison |
|-------------|-------------|-----------|-------------------|-----------------|---------------|---------------------------------------------------------------------------------------------------------------------------------------------------------------------------------------------------------------------------------------------------------------------------------------|-------------------------------------------------------------------------------------------------|--------------------------|
| NIOSH-53    |             | 8.79      |                   | 21.00           | 0.42          |                                                                                                                                                                                                                                                                                       | duration changed from 15min-1hr to 1-4hr (exposed time >> 50 min due to ventilation conditions) | Yes                      |
| NIOSH-57    |             | 30.28     |                   | 35.00           | 0.87          |                                                                                                                                                                                                                                                                                       |                                                                                                 | Yes                      |
| NIOSH-58    |             | 29.18     |                   | 35.00           | 0.83          |                                                                                                                                                                                                                                                                                       |                                                                                                 | Yes                      |
| NIOSH-32    |             | 7.02      |                   | 1.40            | 5.01          | contextual information indicates industrial use is more appropriate for this type of activity and setting than professional use; contextual information indicates PROC15 is more appropriate than PROC13 (use of small quantities of chemicals)                                       |                                                                                                 | Yes                      |
| NIOSH-33    |             | 3.68      |                   | 4.20            | 0.88          | contextual information indicates industrial use is more appropriate for this type of activity and setting than professional use; contextual information indicates PROC15 is more appropriate than PROC13 (use of small quantities of chemicals)                                       |                                                                                                 | Yes                      |
| NIOSH-35    |             | 0.04      |                   | 0.21            | 0.19          | contextual information indicates industrial use is more appropriate for this type of activity and setting than professional use; contextual information indicates PROC15 is more appropriate than PROC13 (use of small quantities of chemicals)                                       |                                                                                                 | Yes                      |
| NIOSH-30    |             | 0.90      |                   | 4.20            | 0.21          |                                                                                                                                                                                                                                                                                       | duration changed from 15min-1hr to 1-4hr (exposed time >> 40 min due to ventilation conditions) | Yes                      |
| ETEAM-2     | 2.49        |           | 140               |                 | 0.02          |                                                                                                                                                                                                                                                                                       |                                                                                                 | Yes                      |
| ETEAM-42    | 2.80        |           | 5                 |                 | 0.56          | contextual information indicates professional use is more appropriate for this type of activity and setting than industrial use; contextual information indicates PROC19 is more appropriate than PROC8a (ECHA R12: transfer task, however with limited quantities; intimate contact) |                                                                                                 | Yes                      |
| ETEAM-46    | 1.70        |           | 1.5               |                 | 1.13          |                                                                                                                                                                                                                                                                                       |                                                                                                 | Yes                      |
| ETEAM-54    |             |           |                   |                 |               | Worksituation inside of a ship's hold resembles confined space conditions; extremely high (unrealistic) level of dust exposure; comparison of measured                                                                                                                                |                                                                                                 | No                       |
| ETEAM-9941  | 0.06        |           | 0.14              |                 | 0.41          |                                                                                                                                                                                                                                                                                       | concentration changed from >25% to 1-5% (conservative: low concentration in alloy assumed)      | Yes                      |
| ETEAM-10043 | 0.14        |           | 0.14              |                 | 1.01          |                                                                                                                                                                                                                                                                                       | concentration changed from >25% to 1-5% (conservative: low concentration in alloy assumed)      | Yes                      |
| ETEAM-10110 | 3.320       |           | 3.5               |                 | 0.95          |                                                                                                                                                                                                                                                                                       |                                                                                                 | Yes                      |
| SUVA-10     | 0.037       |           | 0.12              |                 | 0.31          |                                                                                                                                                                                                                                                                                       |                                                                                                 | Yes                      |

| Reference                                                   | Additional info                                          | ID          | Category | Task description                                                                                                                      | Ind/Prof | PROC | Substance         | CAS no     | MW     |
|-------------------------------------------------------------|----------------------------------------------------------|-------------|----------|---------------------------------------------------------------------------------------------------------------------------------------|----------|------|-------------------|------------|--------|
| SUVA database report: 11.0226/6.10                          | ETEAM reference 10672/ 10694/ 10790/ 10801/ 10812/ 10825 | SUVA-11     | liquids  | Pathology work. Organs washing and cutting in an autopsy lab                                                                          | Ind      | 15   | Formaldehyde      | 50-00-0    | 30     |
| SUVA database report: 07.0274/5.0                           | ETEAM reference 10708/ 10709                             | SUVA-12     | liquids  | Batch-wise polymer granule production (dissolving in solvent mixture distilling the solution, grounding, sieving and packing in bags) | Ind      | 3    | Trichloroethylene | 79-01-6    | 131.4  |
| SUVA database report: 02.0372/6.4                           | ETEAM reference 10671/ 10713/ 10714                      | SUVA-13     | liquids  | Coating of furniture parts                                                                                                            | Ind      | 7    | n-Butyl acetate   | 123-86-4   | 116.2  |
| Tongeren et.al; Ann Work Exp Health 2017; 61(8): 921-938    | BAUA-ITEM data (study F2137)                             | ETEAM-10940 | solids   | Spray painting in the shipyard industry                                                                                               | Pro      | 11   | Copper (I) oxide  | 1317-38-0  | 79.5   |
| Lee et.al; Ann Work Exp Health 2019; 63(2): 218-229         | additional ES info obtained from Emily Lee               | NIOSH-9     | solids   | Casting                                                                                                                               | Ind      | 23   | Tin               | 7440-31-5  | 118.69 |
| Lee et.al; Ann Work Exp Health 2019; 63(2): 218-229         | additional ES info obtained from Emily Lee               | NIOSH-11    | solids   | Powder sieving                                                                                                                        | Ind      | 8b   | Tin               | 7440-31-5  | 118.69 |
| Ishii et.al; J Chem Health Saf 2017; 24(1): 8-20            |                                                          | ISHII-1     | liquids  | Spray painting, air gun spraying                                                                                                      | Ind      | 7    | Ethyl Benzene     | 100-41-4   | 106.2  |
| Ishii et.al; J Chem Health Saf 2017; 24(1): 8-20            |                                                          | ISHII-2     | liquids  | Spray painting, air gun spraying                                                                                                      | Ind      | 7    | Ethyl Benzene     | 100-41-4   | 106.2  |
| Ishii et.al; J Chem Health Saf 2017; 24(1): 8-20            |                                                          | ISHII-3     | liquids  | Spray painting, air gun spraying                                                                                                      | Ind      | 7    | Ethyl Benzene     | 100-41-4   | 106.2  |
| Ishii et.al; J Chem Health Saf 2017; 24(1): 8-20            |                                                          | ISHII-4     | liquids  | Spray painting, air gun spraying                                                                                                      | Ind      | 7    | Ethyl Benzene     | 100-41-4   | 106.2  |
| Ishii et.al; J Chem Health Saf 2017; 24(1): 8-20            |                                                          | ISHII-5     | liquids  | Roller painting, touch up painting                                                                                                    | Ind      | 10   | Ethyl Benzene     | 100-41-4   | 106.2  |
| Ishii et.al; J Chem Health Saf 2017; 24(1): 8-20            |                                                          | ISHII-6     | liquids  | Roller painting, touch up painting                                                                                                    | Ind      | 10   | Ethyl Benzene     | 100-41-4   | 106.2  |
| Ishii et.al; J Chem Health Saf 2017; 24(1): 8-20            |                                                          | ISHII-7     | liquids  | Roller painting, touch up painting                                                                                                    | Ind      | 10   | Ethyl Benzene     | 100-41-4   | 106.2  |
| Jankowska et.al; Int J Occup Saf Ergon 2015; 21(4): 471-479 | Jankowska, 2015                                          | JANKO-1     | liquids  | transfer from the anaesthetic apparatus to the lungs                                                                                  | Pro      | 9    | Sevoflurane       | 28523-86-6 | 200    |
| Jankowska et.al; Int J Occup Saf Ergon 2015; 21(4): 471-479 | Jankowska, 2015                                          | JANKO-2     | liquids  | transfer from the anaesthetic apparatus to the lungs                                                                                  | Pro      | 9    | Sevoflurane       | 28523-86-6 | 200    |
| Jankowska et.al; Int J Occup Saf Ergon 2015; 21(4): 471-479 | Jankowska, 2015                                          | JANKO-3     | liquids  | transfer from the anaesthetic apparatus to the lungs                                                                                  | Pro      | 9    | Sevoflurane       | 28523-86-6 | 200    |

| ID          | VP [Pa] | Fugacity | Conc (%) | Duration Category | Indoor/ Outdoor | Ventilation | LEV | RPE | n  | Sample time (min) | <LOD    | GM (mg/m3) | GM (ppm) | GSD   |
|-------------|---------|----------|----------|-------------------|-----------------|-------------|-----|-----|----|-------------------|---------|------------|----------|-------|
| SUVA-11     | 41      | Low      | >25%     | >4hr              | I               | No          | No  | No  | 6  | 14-104 (mean>30)  | 0       |            | 0.45     | 2.56  |
| SUVA-12     | 9900    | Medium   | >25%     | >4hr              | I               | No          | No  | No  | 6  | 75-140            | 0       |            | 4.35     | 2.270 |
| SUVA-13     | 1120    | Medium   | >25%     | >4hr              | I               | No          | Yes | No  | 6  | 72-125            | 0       |            | 19.68    | 1.410 |
| ETEAM-10940 |         | High     | >25%     | >4hr              | I               | GV          | Yes | No  | 6  | 15-60 (mean>30)   | 0       | 7.010      |          | 3.520 |
| NIOSH-9     |         | Medium   | >25%     | >4hr              | I               | GV          | No  | No  | 6  | 330               | No info | 0.03       |          | 5.1   |
| NIOSH-11    |         | Medium   | >25%     | >4hr              | I               | GV          | No  | No  | 7  | 330               | No info | 0.22       |          | 4.35  |
| ISHII-1     | 952     | Medium   | >25%     | >4hr              | I               | No          | Yes | No  | 10 | ~480              | 0       |            | 3.11     | 2.15  |
| ISHII-2     | 952     | Medium   | 5-25%    | >4hr              | I               | No          | Yes | No  | 10 | ~480              | 0       |            | 3.11     | 2.15  |
| ISHII-3     | 952     | Medium   | 5-25%    | >4hr              | I               | GV          | No  | No  | 11 | ~480              | 0       |            | 15.1     | 2.95  |
| ISHII-4     | 952     | Medium   | 1-5%     | >4hr              | O               | Outdoors    | No  | No  | 9  | ~480              | 0       |            | 21.81    | 3.167 |
| ISHII-5     | 952     | Medium   | 1-5%     | >4hr              | O               | Outdoors    | No  | No  | 11 | ~480              | 0       |            | 4.71     | 3.84  |
| ISHII-6     | 952     | Medium   | 1-5%     | >4hr              | I               | GV          | No  | No  | 12 | ~480              | 0       |            | 17.24    | 2.9   |
| ISHII-7     | 952     | Medium   | 5-25%    | >4hr              | I               | GV          | No  | No  | 9  | ~480              | 0       |            | 21.72    | 2.22  |
| JANKO-1     | 20932   | High     | 1-5%     | 1-4hr             | I               | GV          | Yes | No  | 41 | 360               | 0       |            |          |       |
| JANKO-2     | 20932   | High     | 1-5%     | 1-4hr             | I               | GV          | Yes | No  | 29 | 360               | 0       |            |          |       |
| JANKO-3     | 20932   | High     | 1-5%     | 1-4hr             | I               | GV          | No  | No  | 56 | 360               | 0       |            |          |       |

| ID          | P75 (mg/m3) | P75 (ppm) | TRA value (mg/m3) | TRA value (ppm) | ratio P75/TRA | Revised setting (ind/pro) and PROC assignment                                                                                         | Revised RMM/OC/PPE assignment                                                      | Valid for TRA comparison |
|-------------|-------------|-----------|-------------------|-----------------|---------------|---------------------------------------------------------------------------------------------------------------------------------------|------------------------------------------------------------------------------------|--------------------------|
| SUVA-11     |             | 0.85      |                   | 5.00            | 0.17          |                                                                                                                                       |                                                                                    | Yes                      |
| SUVA-12     |             | 7.56      |                   | 10.00           | 0.76          | contextual information indicates PROC3 is more appropriate than PROC4 (ECHA R12: closed batch proces)                                 | LEV changed from Yes to No (information in report indicates no or inefficient LEV) | Yes                      |
| SUVA-13     |             | 24.80     |                   | 12.50           | 1.98          |                                                                                                                                       |                                                                                    | Yes                      |
| ETEAM-10940 | 16.370      |           | 28                |                 | 0.58          |                                                                                                                                       | fugacity assumed high (spraying; solid in liquid)                                  | Yes                      |
| NIOSH-9     | 0.09        |           | 2.10              |                 | 0.04          |                                                                                                                                       |                                                                                    | Yes                      |
| NIOSH-11    | 0.59        |           | 0.70              |                 | 0.84          |                                                                                                                                       |                                                                                    | Yes                      |
| ISHII-1     |             | 5.21      |                   | 12.50           | 0.42          |                                                                                                                                       |                                                                                    | Yes                      |
| ISHII-2     |             | 5.21      |                   | 7.50            | 0.69          |                                                                                                                                       |                                                                                    | Yes                      |
| ISHII-3     |             | 31.31     |                   | 105.00          | 0.30          |                                                                                                                                       |                                                                                    | Yes                      |
| ISHII-4     |             | 47.43     |                   | 35.00           | 1.36          |                                                                                                                                       |                                                                                    | Yes                      |
| ISHII-5     |             | 11.66     |                   | 7.00            | 1.67          |                                                                                                                                       |                                                                                    | Yes                      |
| ISHII-6     |             | 35.33     |                   | 7.00            | 5.05          |                                                                                                                                       |                                                                                    | Yes                      |
| ISHII-7     |             | 37.18     |                   | 21.00           | 1.77          |                                                                                                                                       |                                                                                    | Yes                      |
| JANKO-1     | 12.3        | 1.50      |                   | 4.20            | 0.36          | contextual information indicates PROC9 is more appropriate than PROC8a (ECHA R12: transfer, but limited quantities; dedicated system) |                                                                                    | Yes                      |
| JANKO-2     | 19.6        | 2.40      |                   | 4.20            | 0.57          | contextual information indicates PROC9 is more appropriate than PROC8a (ECHA R12: transfer, but limited quantities; dedicated system) |                                                                                    | Yes                      |
| JANKO-3     | 10.93       | 1.34      |                   | 21.00           | 0.06          | contextual information indicates PROC9 is more appropriate than PROC8a (ECHA R12: transfer, but limited quantities; dedicated system) |                                                                                    | Yes                      |

| Reference                                                                            | Additional info                                               | ID         | Category | Task description                                     | Ind/Prof | PROC | Substance                  | CAS no     | MW    |
|--------------------------------------------------------------------------------------|---------------------------------------------------------------|------------|----------|------------------------------------------------------|----------|------|----------------------------|------------|-------|
| Jankowska et.al; Int J Occup Saf Ergon 2015; 21(4): 471-479                          | Jankowska, 2015                                               | JANKO-4    | liquids  | transfer from the anaesthetic apparatus to the lungs | Pro      | 9    | Sevoflurane                | 28523-86-6 | 200   |
| Jankowska et.al; Int J Occup Saf Ergon 2015; 21(4): 471-479                          | Jankowska, 2015                                               | JANKO-5    | liquids  | use in operating rooms                               | Pro      | 2    | Sevoflurane                | 28523-86-6 | 200   |
| Landberg et.al; Ann Work Exp Health 2019; 63(1); 68-76                               | Safety Science 2018; 109: 412-420                             | LANDB-1    | liquids  | Spray painting - Painting locomotive                 | Ind      | 7    | Hexamethylene diisocyanate | 822-06-0   | 168.2 |
| Landberg et.al; Ann Work Exp Health 2019; 63(1); 68-76                               | Safety Science 2018; 109: 412-420                             | LANDB-2    | liquids  | Plastic moulding industry - Rolling                  | Ind      | 10   | Styrene                    | 100-42-5   | 104.2 |
| Landberg et.al; Ann Work Exp Health 2019; 63(1); 68-76                               | Safety Science 2018; 109: 412-420                             | LANDB-3    | liquids  | Plastic moulding industry - Spraying                 | Ind      | 7    | Styrene                    | 100-42-5   | 104.2 |
| Hofstetter et.al; Ann Occup Hyg 2013; 57(2): 210-220                                 |                                                               | HOFST-2    | liquids  | Spray painting                                       | Ind      | 7    | Toluene                    | 108-88-3   | 92.1  |
| Hammond et.al; Ann Occup Hyg 2011; 55(6): 591-600                                    | from Spinazze et.al; Ann Work Exp Health 2017; 61(3): 284-298 | HAMMO-1    | liquids  | Gel coating                                          | Ind      | 7    | Styrene                    | 100-42-5   | 104.2 |
| Hammond et.al; Ann Occup Hyg 2011; 55(6): 591-600                                    | from Spinazze et.al; Ann Work Exp Health 2017; 61(3): 284-298 | HAMMO-3    | liquids  | Vacuum injection into mold                           | Ind      | 3    | Styrene                    | 100-42-5   | 104.2 |
| Carlo et.al; CDCP/NIOSH 2007; report EPHB 306-16a                                    | from Spinazze et.al; Ann Work Exp Health 2017; 61(3): 284-298 | CARLO-1    | liquids  | Boat manufacturing - hull and deck lamination        | Ind      | 10   | Styrene                    | 100-42-5   | 104.2 |
| Carlo et.al; CDCP/NIOSH 2007; report EPHB 306-16a                                    | from Spinazze et.al; Ann Work Exp Health 2017; 61(3): 284-298 | CARLO-2    | liquids  | Boat manufacturing - small part lamination           | Ind      | 10   | Styrene                    | 100-42-5   | 104.2 |
| Angelini et.al; PLOS one, 10 February 2016                                           |                                                               | MANE-11    | liquids  | weighing activity in fragrances/flavour industry     | Ind      | 8b   | Dimethyl sulphide          | 75-18-3    | 62.13 |
| CONCAWE 01/06 Appendix 4: reported in Concawe report 18-13 supplementary table S1.3  | Gas oil                                                       | Con01/06-4 | liquids  | Driver of road tanker with unloading                 | Pro      | 8b   | Gas oil                    | 64741-43-1 | 170.3 |
| CONCAWE 06/07 Appendix 4, reported in Concawe report 18-13 supplementary table S1.17 | Kerosine                                                      | Con06/07-2 | liquids  | Plane refueling - full shift                         | Pro      | 8b   | Kerosine                   | 8008-20-6  | 128.2 |
| CONCAWE 06/07 Appendix 4, reported in Concawe report 18-13 supplementary table S1.17 | Kerosine                                                      | Con06/07-3 | liquids  | Tanker driver loading and unloading full shift       | Pro      | 8b   | Kerosine                   | 8008-20-6  | 128.2 |
| CONCAWE 06/07 Appendix 4, reported in Concawe report 18-13 supplementary table S1.17 | Kerosine                                                      | Con06/07-4 | liquids  | Tanker driver loading and unloading short term       | Pro      | 8b   | Kerosine                   | 8008-20-6  | 128.2 |
| CONCAWE 06/07 Appendix 4, reported in Concawe report 18-13 supplementary table S1.17 | Kerosine                                                      | Con06/07-5 | liquids  | maintenance worker                                   | Pro      | 8a   | Kerosine                   | 8008-20-6  | 128.2 |

| ID         | VP [Pa] | Fugacity | Conc (%) | Duration Category | Indoor/ Outdoor | Ventilation | LEV | RPE | n  | Sample time (min) | <LOD | GM (mg/m3) | GM (ppm) | GSD  |
|------------|---------|----------|----------|-------------------|-----------------|-------------|-----|-----|----|-------------------|------|------------|----------|------|
| JANKO-4    | 20932   | High     | 1-5%     | 1-4hr             | I               | GV          | No  | No  | 44 | 360               | 0    |            |          |      |
| JANKO-5    | 20932   | High     | 1-5%     | 1-4hr             | I               | GV          | Yes | No  | 42 | 360               | 0    |            |          |      |
| LANDB-1    | 1       | Low      |          |                   |                 |             |     |     |    |                   |      |            |          |      |
| LANDB-2    | 667     | Medium   |          |                   |                 |             |     |     |    |                   |      |            |          |      |
| LANDB-3    | 667     | Medium   |          |                   |                 |             |     |     |    |                   |      |            |          |      |
| HOFST-2    | 3089    | Medium   | 5-25%    | <15min            | I               | GV          | No  | No  | 11 | 240               | 0    |            | 8.2      | 1.20 |
| HAMMO-1    | 667     | Medium   | >25%     | >4hr              | I               | GV          | No  | No  | 19 | 45                | 0    |            | 66       | 2.60 |
| HAMMO-3    | 667     | Medium   | >25%     | >4hr              | I               | GV          | No  | No  | 21 | 120               | 0    |            | 1.8      | 1.50 |
| CARLO-1    | 667     | Medium   | >25%     | 15min-1hr         | I               | GV          | No  | No  | 11 | ~60               | 0    |            | 13.01    | 1.28 |
| CARLO-2    | 667     | Medium   | >25%     | 15min-1hr         | I               | GV          | No  | No  | 8  | ~60               | 0    |            | 11.55    | 1.28 |
| MANE-11    | 52300   | High     | >25%     | >4hr              | I               | EV          | No  | No  | 9  | 42-58 (mean>30)   | 0    |            | 3.08     | 3.66 |
| Con01/06-4 | 40      | Low      | >25%     | 1-4hr             | O               | Outdoors    | No  | No  | 6  | 330min - 604mins  | 0    |            | 0.17     | 2.60 |
| Con06/07-2 | 370     | Low      | >25%     | >4hr              | O               | Outdoors    | No  | No  | 55 | 120min - 757min   | 0    |            | 0.10     | 2.90 |
| Con06/07-3 | 370     | Low      | >25%     | 1-4hr             | O               | Outdoors    | No  | No  | 32 | 266min-532min     | 1    |            | 0.67     | 4.59 |
| Con06/07-4 | 370     | Low      | >25%     | 15min-1hr         | O               | Outdoors    | No  | No  | 16 | 14min-64min       | 1    |            | 0.36     | 6.10 |
| Con06/07-5 | 370     | Low      | >25%     | >4hr              | O               | Outdoors    | No  | No  | 6  | 120min-531min     | 0    |            | 0.39     | 2.29 |

| ID         | P75 (mg/m3) | P75 (ppm) | TRA value (mg/m3) | TRA value (ppm) | ratio P75/TRA | Revised setting (ind/pro) and PROC assignment                                                                                                                                                                                           | Revised RMM/OC/PPE assignment                                                                                                                                                                       | Valid for TRA comparison |
|------------|-------------|-----------|-------------------|-----------------|---------------|-----------------------------------------------------------------------------------------------------------------------------------------------------------------------------------------------------------------------------------------|-----------------------------------------------------------------------------------------------------------------------------------------------------------------------------------------------------|--------------------------|
| JANKO-4    | 11.18       | 1.37      |                   | 21.00           | 0.07          | contextual information indicates PROC9 is more appropriate than PROC8a (ECHA R12: transfer, but limited quantities; dedicated system)                                                                                                   |                                                                                                                                                                                                     | Yes                      |
| JANKO-5    | 2.69        | 0.33      |                   | 0.84            | 0.39          |                                                                                                                                                                                                                                         |                                                                                                                                                                                                     | Yes                      |
| LANDB-1    |             |           |                   |                 |               | insufficient information to generate TRA estimate; original authors had no longer access to their detailed survey notes                                                                                                                 |                                                                                                                                                                                                     | No                       |
| LANDB-2    |             |           |                   |                 |               | insufficient information to generate TRA estimate; original authors had no longer access to their detailed survey notes                                                                                                                 |                                                                                                                                                                                                     | No                       |
| LANDB-3    |             |           |                   |                 |               | insufficient information to generate TRA estimate; original authors had no longer access to their detailed survey notes                                                                                                                 |                                                                                                                                                                                                     | No                       |
| HOFST-2    |             | 9.22      |                   | 10.50           | 0.88          | contextual information indicates industrial use is more appropriate for this type of activity and setting than professional use; contextual information indicates PROC7 is more appropriate than PROC11 (ECHA R12: industrial spraying) |                                                                                                                                                                                                     | Yes                      |
| HAMMO-1    |             | 125.70    |                   | 175.00          | 0.72          |                                                                                                                                                                                                                                         | duration changed from 15min-1hr to >4hr (incorrect adjustment of time; sampling time = exposure time); ventilation changed from EV to GV (information on ventilation does not justify EV (> 5 ach)) | Yes                      |
| HAMMO-3    |             | 2.37      |                   | 7.00            | 0.34          | contextual information indicates PROC3 is more appropriate than PROC2 (ECHA R12: proces not continuous)                                                                                                                                 | duration changed from 1-4hr to >4hr (incorrect adjustment of time; sampling time = exposure time); ventilation changed from EV to GV (information on ventilation does not justify EV (> 5 ach))     | Yes                      |
| CARLO-1    |             | 15.36     |                   | 35.00           | 0.44          |                                                                                                                                                                                                                                         | ventilation changed from EV to GV (information on ventilation does not justify EV (> 5 ach))                                                                                                        | Yes                      |
| CARLO-2    |             | 13.64     |                   | 35.00           | 0.39          |                                                                                                                                                                                                                                         | ventilation changed from EV to GV (information on ventilation does not justify EV (> 5 ach))                                                                                                        | Yes                      |
| MANE-11    |             | 7.38      |                   | 45.00           | 0.16          |                                                                                                                                                                                                                                         | ventilation changed from No to EV and LEV changed from Yes to No (LEV replaced by EV due to limited efficiency)                                                                                     | Yes                      |
| Con01/06-4 | 2.28        | 0.33      |                   | 4.20            | 0.08          |                                                                                                                                                                                                                                         |                                                                                                                                                                                                     | Yes                      |
| Con06/07-2 | 1.02        | 0.20      |                   | 3.50            | 0.06          |                                                                                                                                                                                                                                         |                                                                                                                                                                                                     | Yes                      |
| Con06/07-3 | 9.86        | 1.87      |                   | 4.20            | 0.45          |                                                                                                                                                                                                                                         |                                                                                                                                                                                                     | Yes                      |
| Con06/07-4 | 6.36        | 1.22      |                   | 1.40            | 0.87          |                                                                                                                                                                                                                                         |                                                                                                                                                                                                     | Yes                      |
| Con06/07-5 | 3.58        | 0.68      |                   | 17.50           | 0.04          |                                                                                                                                                                                                                                         |                                                                                                                                                                                                     | Yes                      |



| Reference                                                                            | Additional info                                | ID          | Category | Task description                                                                              | Ind/Prof | PROC | Substance | CAS no     | MW    |
|--------------------------------------------------------------------------------------|------------------------------------------------|-------------|----------|-----------------------------------------------------------------------------------------------|----------|------|-----------|------------|-------|
| CONCAWE 06/07 Appendix 4, reported in Concawe report 18-13 supplementary table S1.17 | Kerosine                                       | Con06/07-6  | liquids  | Filter change                                                                                 | Pro      | 8a   | Kerosine  | 8008-20-6  | 128.2 |
| CONCAWE 06/07 Appendix 4, reported in Concawe report 18-13 supplementary table S1.17 | Kerosine                                       | Con06/07-7  | liquids  | Supervisor                                                                                    | Pro      | 2    | Kerosine  | 8008-20-6  | 128.2 |
| Concawe report 13-18 (suppl. Table S1.19)                                            | Concawe 9/02                                   | Con09/02-2  | liquids  | Gasoline blending for research (several m <sup>3</sup> ) - full shift                         | Ind      | 5    | Toluene   | 108-88-3   | 92.1  |
| Concawe report 13-18 (suppl. Table S1.19)                                            | Concawe 9/02                                   | Con09/02-3  | liquids  | Road tanker loading and making deliveries (gasoline and diesel) - full shift                  | Pro      | 8b   | Toluene   | 108-88-3   | 92.1  |
| Concawe report 13-18 (suppl. Table S1.19)                                            | Concawe 9/02                                   | Con09/02-4  | liquids  | Railcar top loading w/o vapour recovery - full shift - mainly gasolines                       | Ind      | 8b   | Toluene   | 108-88-3   | 92.1  |
| Concawe report 13-18 (suppl. Table S1.19)                                            | Concawe 9/02                                   | Con09/02-5  | liquids  | Railcar top loading with vapour recovery - full shift - mainly gasolines                      | Ind      | 8b   | Toluene   | 108-88-3   | 92.1  |
| Concawe report 13-18 (suppl. Table S1.19)                                            | Concawe 9/02                                   | Con09/02-6  | liquids  | Service station attendant, no vapour recovery - full shift (gasoline and diesel)              | Pro      | 8b   | Toluene   | 108-88-3   | 92.1  |
| Concawe report 13-18 (suppl. Table S1.15)                                            | Periago and Prado, Annals Occ Hyg 49 (3); 2005 | PERIAGO-1   | liquids  | Service station attendant, no vapour recovery - full shift (gasoline and diesel)              | Pro      | 8b   | Toluene   | 108-88-3   | 92.1  |
| Concawe report 13-18 (suppl. Table S1.19)                                            | Concawe 9/02                                   | Con09/02-7  | liquids  | Service station attendant, with vapour recovery (Stage II) - full shift (gasoline and diesel) | Pro      | 8b   | Toluene   | 108-88-3   | 92.1  |
| Concawe report 13-18 (suppl. Table S1.19)                                            | Concawe 9/02                                   | Con09/02-11 | liquids  | Road tanker offloading at service station (gasoline and diesel)                               | Pro      | 8b   | Toluene   | 108-88-3   | 92.1  |
| Concawe report 13-18 (suppl. Table S1.19)                                            | Concawe 9/02                                   | Con09/02-12 | liquids  | Drum filler - short term (peak in original report): 20 - 40 barrels                           | Ind      | 8b   | Gasoline  | 86290-81-5 | 73.4  |
| Concawe report 13-18 (suppl. Table S1.19)                                            | Concawe 5/09                                   | Con05/09-2  | liquids  | R&D blending operator                                                                         | Ind      | 5    | Gasoline  | 86290-81-5 | 73.4  |
| Concawe report 13-18 (suppl. Table S1.19)                                            | Concawe 5/09                                   | Con05/09-3  | liquids  | Use of gasoline-powered landscaping equipment                                                 | Pro      | 16   | Gasoline  | 86290-81-5 | 73.4  |

| ID          | VP [Pa] | Fugacity | Conc (%) | Duration Category | Indoor/ Outdoor | Ventilation | LEV | RPE | n  | Sample time (min) | <LOD | GM (mg/m3) | GM (ppm) | GSD   |
|-------------|---------|----------|----------|-------------------|-----------------|-------------|-----|-----|----|-------------------|------|------------|----------|-------|
| Con06/07-6  | 370     | Low      | >25%     | 1-4hr             | O               | Outdoors    | No  | No  | 6  | 41min-115min      | 0    |            | 2.99     | 2.70  |
| Con06/07-7  | 370     | Low      | >25%     | >4hr              | O               | Outdoors    | No  | No  | 8  | 355min -506min    | 0    |            | 0.1      | 3.32  |
| Con09/02-2  | 3089    | Medium   | 5-25%    | >4hr              | I               | GV          | No  | No  | 6  | 215 - 487         | 0    |            | 2.12     | 2.768 |
| Con09/02-3  | 3089    | Medium   | 5-25%    | 1-4hr             | O               | Outdoors    | Yes | No  | 33 | 220 - 555         | 10   |            | 0.22     | 2.809 |
| Con09/02-4  | 3089    | Medium   | 5-25%    | >4hr              | I               | No          | no  | No  | 15 | 210 - 450         | 1    |            | 1.8      | 5.943 |
| Con09/02-5  | 3089    | Medium   | 5-25%    | >4hr              | I               | No          | yes | No  | 12 | 64 - 355          | 0    |            | 0.32     | 1.936 |
| Con09/02-6  | 3089    | Medium   | 5-25%    | 1-4hr             | O               | Outdoors    | No  | No  | 19 | 252 - 490         | 2    |            | 0.12     | 1.626 |
| PERIAGO-1   | 3089    | Medium   | 5-25%    | 1-4hr             | O               | Outdoors    | No  | No  | 28 | NA                | NA   |            | 0.14     | 1.6   |
| Con09/02-7  | 3089    | Medium   | 5-25%    | 1-4hr             | O               | Outdoors    | Yes | No  | 7  | 288 min - 437 min | 0    |            | 0.04     | 1.402 |
| Con09/02-11 | 3089    | medium   | 5-25%    | >4hr              | O               | Outdoors    | Yes | No  | 7  | 43 - 97           | 0    |            | 0.35     | 2.281 |
| Con09/02-12 | 27000   | High     | >25%     | >4hr              | I               | No          | No  | No  | 7  | 31 - 45           | 0    |            | 87.88    | 2.157 |
| Con05/09-2  | 27000   | High     | >25%     | >4hr              | I               | EV          | No  | No  | 7  | NA ('shift')      | 0    |            | 2.84     | 3.703 |
| Con05/09-3  | 27000   | High     | >25%     | 1-4hr             | O               | Outdoors    | No  | No  | 12 | 1-4 hr            | 0    |            | 0.4      | 2.56  |

| ID          | P75 (mg/m3) | P75 (ppm) | TRA value (mg/m3) | TRA value (ppm) | ratio P75/TRA | Revised setting (ind/pro) and PROC assignment | Revised RMM/OC/PPE assignment | Valid for TRA comparison |
|-------------|-------------|-----------|-------------------|-----------------|---------------|-----------------------------------------------|-------------------------------|--------------------------|
| Con06/07-6  | 30.66       | 5.84      |                   | 10.50           | 0.56          |                                               |                               | Yes                      |
| Con06/07-7  | 1.15        | 0.22      |                   | 3.50            | 0.06          |                                               |                               | Yes                      |
| Con09/02-2  | 15.9        | 4.40      |                   | 21.00           | 0.21          |                                               |                               | Yes                      |
| Con09/02-3  | 1.7         | 0.45      |                   | 1.26            | 0.36          |                                               |                               | Yes                      |
| Con09/02-4  | 22.6        | 6.30      |                   | 15.00           | 0.42          |                                               |                               | Yes                      |
| Con09/02-5  | 1.9         | 0.50      |                   | 0.75            | 0.67          |                                               |                               | Yes                      |
| Con09/02-6  | 0.6         | 0.16      |                   | 12.60           | 0.01          |                                               |                               | Yes                      |
| PERIAGO-1   | 0.8         | 0.21      |                   | 12.60           | 0.02          |                                               |                               | Yes                      |
| Con09/02-7  | 0.2         | 0.05      |                   | 1.80            | 0.03          |                                               |                               | Yes                      |
| Con09/02-11 | 2.28        | 0.61      |                   | 2.10            | 0.29          |                                               |                               | Yes                      |
| Con09/02-12 | 444.4       | 148.10    |                   | 150.00          | 0.99          |                                               |                               | Yes                      |
| Con05/09-2  | 20.66       | 6.89      |                   | 75.00           | 0.09          |                                               |                               | Yes                      |
| Con05/09-3  | 2.28        | 0.76      |                   | 21.00           | 0.04          |                                               |                               | Yes                      |

**LEGENDA**

|              |                                                                                                                            |
|--------------|----------------------------------------------------------------------------------------------------------------------------|
| <b>Pro</b>   | bold, italic font, grey background: ECETOC assignment of PROC/RMM/setting deviates from assignment in original publication |
| <b>518</b>   | bold/italic font: vapour pressure in original reference, if no Vp at 20 or 25 °C was available in ECHA database            |
| <b>10.25</b> | bold font, grey background: value recalculated by ECETOC reviewers                                                         |
